# Supplementary material for: Longitudinal Cognitive Decline in a Novel Rodent Model of Cerebral Amyloid Angiopathy Type-1
Source: Int J Mol Sci. 2020 Mar 28;21(7):2348. doi: 10.3390/ijms21072348 (PMC7177469; doi:10.3390/ijms21072348)
Supplement: Supplementary file 1 [file ijms-21-02348-s001.pdf]

Supplementary Materials

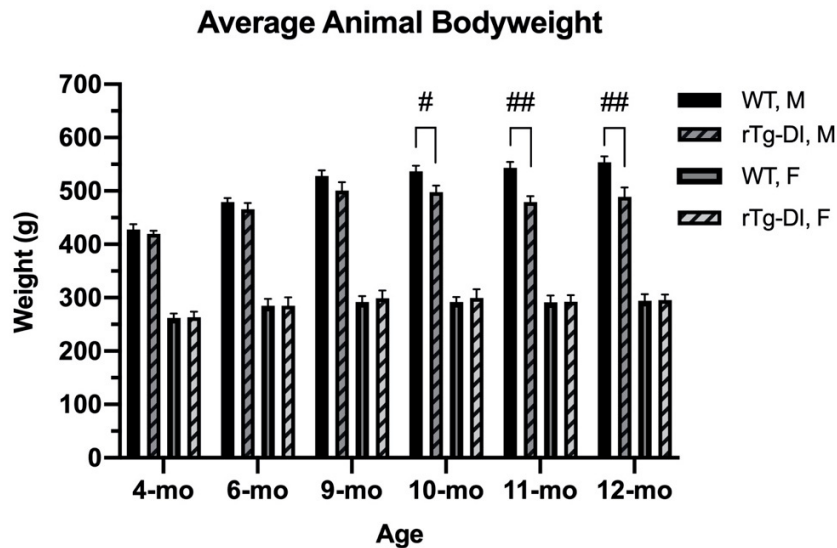

**Figure 1. Average rat bodyweight.** rTg-DI males weighed less at 10-,  $p < .05$ , 11-,  $p < .005$  and 12-months,  $p < .005$  than WT males. Data represent mean + SEM. #  $p < .05$ , ##  $p < .005$

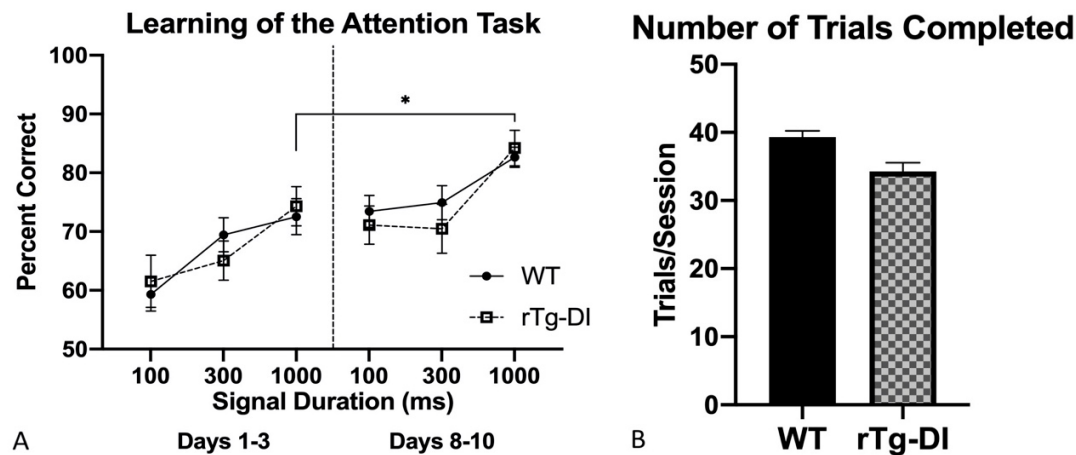

**Figure 2. Signal detection and response initiation task at 7-months of age.** A) Graph showing learning of signal detection and motor response; accuracy in response to the longest signal duration increased across trial days. B) The rats completed similar number of trials. Data represent mean + SEM. \*  $p < .01$

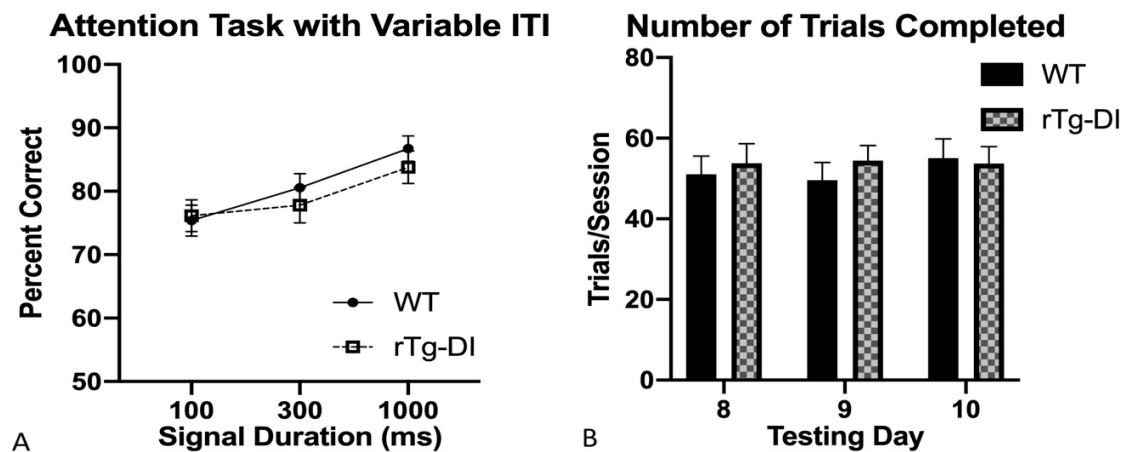

**Figure 3.** Signal detection with variable pre-stimulus interval task at 8-months of age. A) Graph showing learning of the varied pre-stimulus interval; rats responded accurately across trial days. B) Rats completed similar numbers of trials. Data represent mean + SEM.

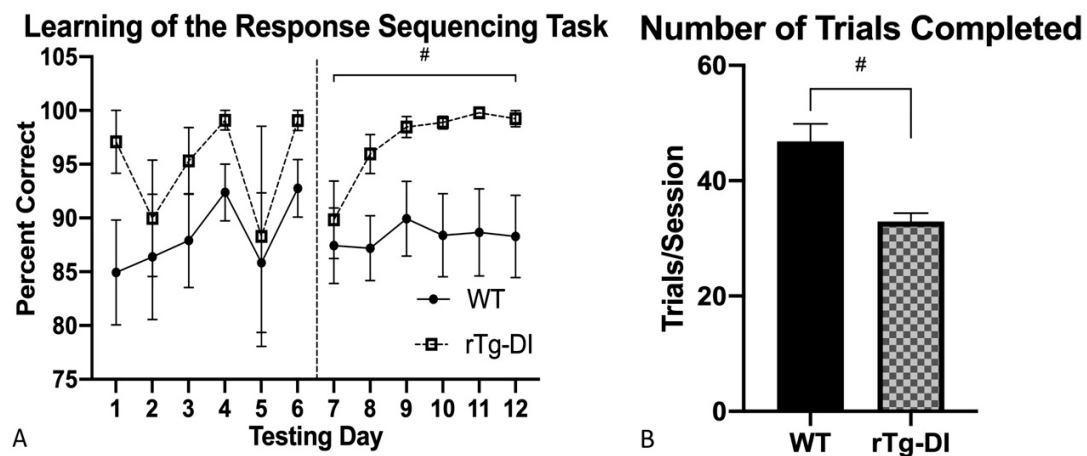

**Figure 4.** FR2-chained responding task at 9 months of age. A) Graph showing learning of conditional response discrimination; rTg-DI rats responded more accurately on the final trial days than WT. B) rTg-DI completed fewer trials than WT. Data represent mean + SEM. #  $p < .05$

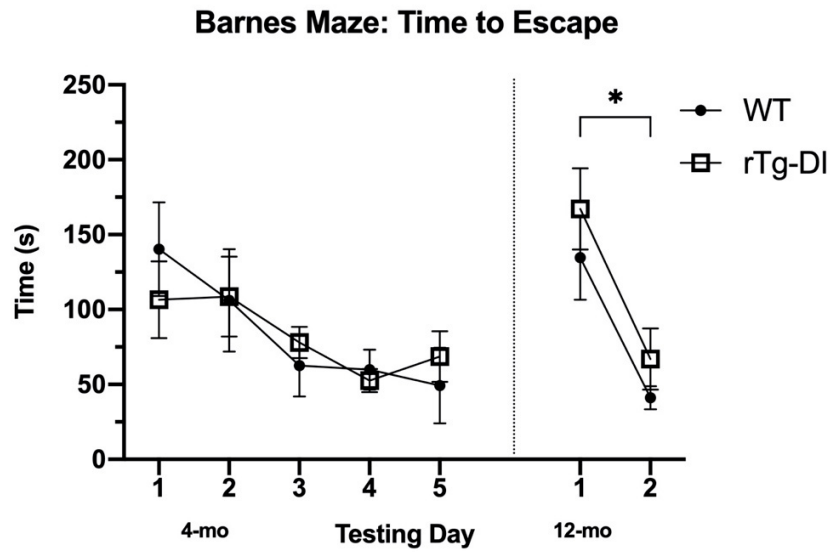

**Figure 5. Barnes Circular Maze.** Latency to escape; animals took a similar amount of time to escape across trial days at 4-months of age and escaped more quickly on the second trial day at 12-months than the first. \*  $p < .01$ .

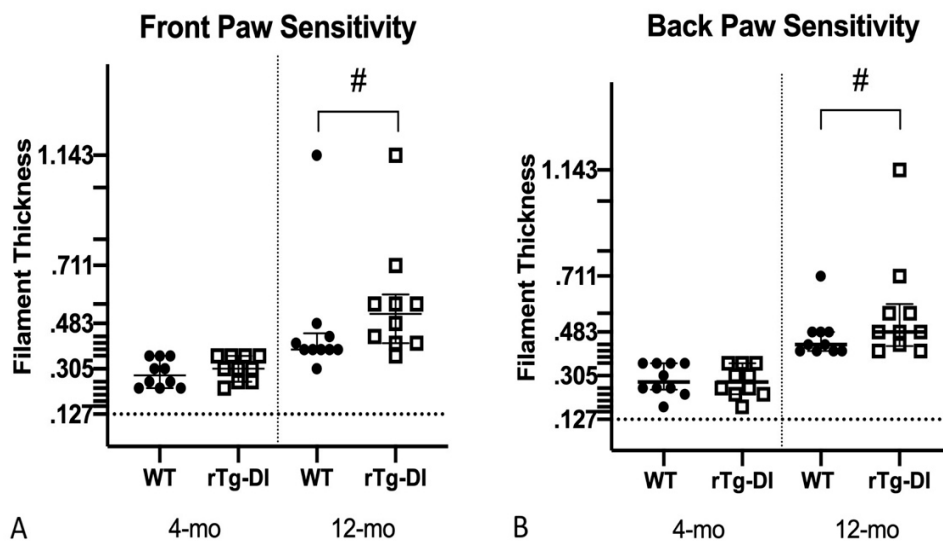

**Figure 6. Paw withdrawal reflex.** X-axis denotes Von Frey Hair filament thickness; the thinnest filament is represented by a horizontal dashed line. A response to a thicker filament represents less sensitivity. A) rTg-DI front paws were less sensitive at 12-months of age than WT. B) rTg-DI back paws were less sensitive at 12-months of age than WT. Data represents median with interquartile range. #  $p < .05$
